# Supplementary material
Source: publisher figshare collection journal article supplement (https://sage.figshare.com/ndownloader/files/24183840)
Supplement: Supplementary file 1 [file 24183840]

## Supplementary Material B: Income

We now examine the relationship between participants' reported income to the treatment effects. Two of our treatments involve monetary transfers and therefore one may expect a stronger influence of those treatments on participants with lower income. For this purpose we group our participants into three income levels: above average, average and below average. Table B.1 shows the treatment effects per income level. According to Pearson's Chi Square test the only group for which a marginally significant effect shows up is, quite surprisingly, the above average group ( $\chi^2 = 11.447$ ,  $df=4$ , adjusted p-value=0.067). For the other income levels the effects are not significant (below average group:  $\chi^2 = 3.733$ ,  $df=4$ , adjusted p-value=0.542, average group:  $\chi^2 = 3.354$ ,  $df=4$ , adjusted p-value=0.537).

*Table B.1: Percentages of intentions to receive the shot in the treatments and control by income level.*

| Income  | Treatment |                |       |      |         |
|---------|-----------|----------------|-------|------|---------|
|         | Control   | Recommendation | Stock | Cost | Benefit |
| Under   | 49%       | 51%            | 55%   | 54%  | 54%     |
| Average | 63%       | 62%            | 57%   | 64%  | 68%     |
| Above   | 48%       | 51%            | 61%   | 61%  | 61%     |
